# Supplementary material
Source: MDPI journal article supplement (https://www.mdpi.com/2073-4441/12/8/2143)
Supplement: s1 [file s1]

1 **Characterizing supply variability and operational**  
2 **challenges in an intermittent water distribution network**

3 *Supporting Information*  
4

5 **John J. Erickson** <sup>1,2</sup>, **Yamileth Quintero** <sup>3</sup> and **Kara L. Nelson** <sup>1,\*</sup>

6 <sup>1</sup> Department of Civil and Environmental Engineering, University of California, Berkeley, California, 94720-  
7 1710

8 <sup>2</sup> Current Affiliation: Hazen and Sawyer, Dallas, Texas. jerickson@hazenandsawyer.com

9 <sup>3</sup> Instituto de Acueductos y Alcantarillados Nacionales (IDAAAN), Panamá. yquintero@idaan.gob.pa

10 \* Correspondence: karanelson@berkeley.edu; Tel.: +1-510-643-5023

11 Received: date; Accepted: date; Published: date  
12

---

13 **Contents:**

14 **Figure S1:** Location of the study zones and upstream monitoring points.

15 **Figure S2:** Schematic of Study Zone 1

16 **Figure S3:** Schematic of Study Zone 3

17 **Figure S4:** Schematic of Study Zone 4

18 **Figure S5:** Pressure transient at 3:30 am 11-18-2014 at the discharge of the Zone 4 pump station caused  
19 by the startup of the second of two pumps.

20 **Table S1:** The ten zones with the highest break rates.  
21

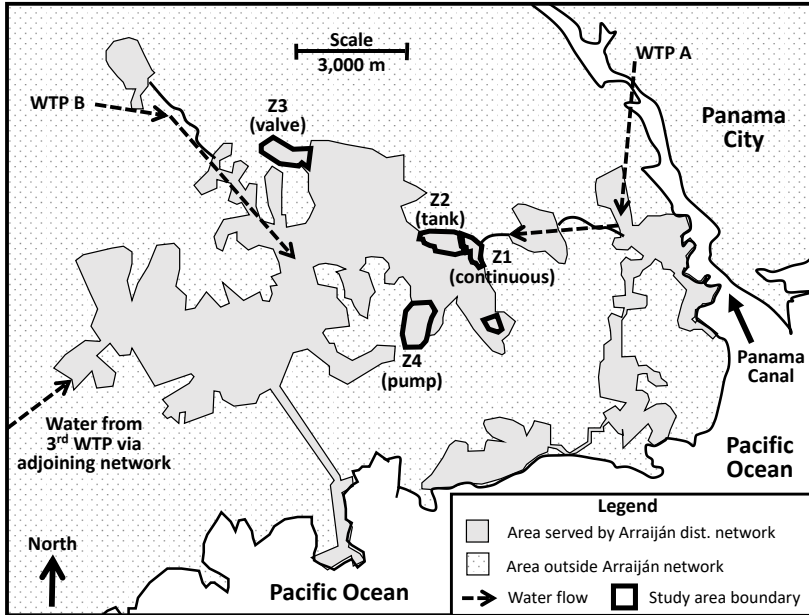

22  
23  
24  
25

Figure S1: Location of the study zones and upstream monitoring points. Source: Modified from Louis Berger Group Fortalecimiento institucional del IDAAN a través de acciones de optimización para la ciudad de Panamá 2010.

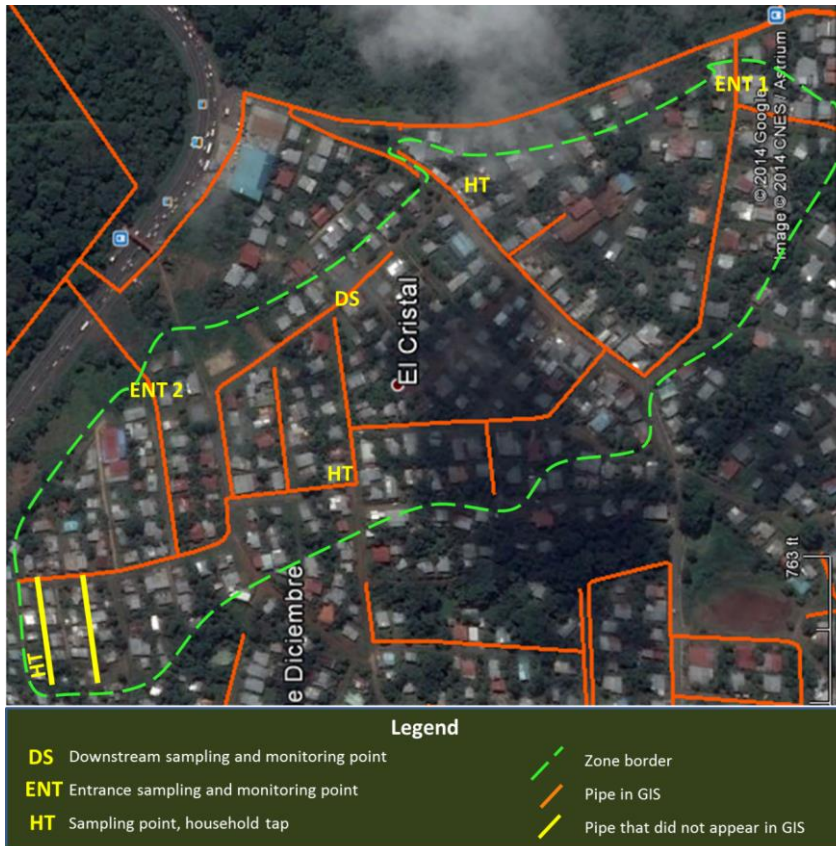

26

27

28

**Figure S2:** Schematic of Study Zone 1. (Source of satellite images and study zone schematic: Google Earth and IDAAN's GIS database)

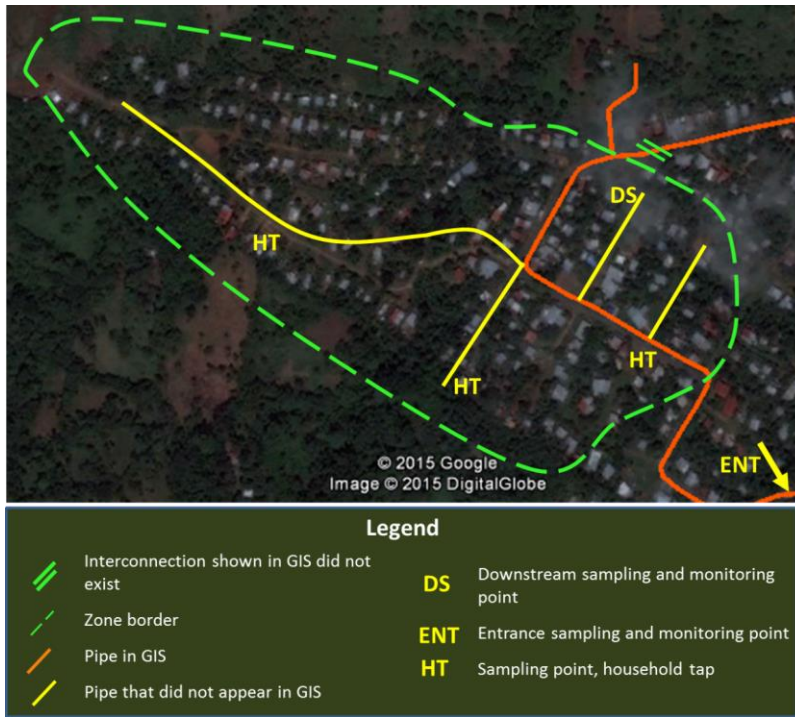

29

30

31

32

33

34

**Figure S3:** Schematic of Study Zone 3. Pressure and entrance flow were measured at the ENT location, approximately 1 km to the southeast of the bottom right corner of the diagram. Water quality grab samples were collected and chlorine, turbidity and pressure were monitored continuously at the pump station discharge, located approximately 400 m to the south (upstream) of ENT. (Source of satellite images and study zone schematic: Google Earth and IDAAN’s GIS database)

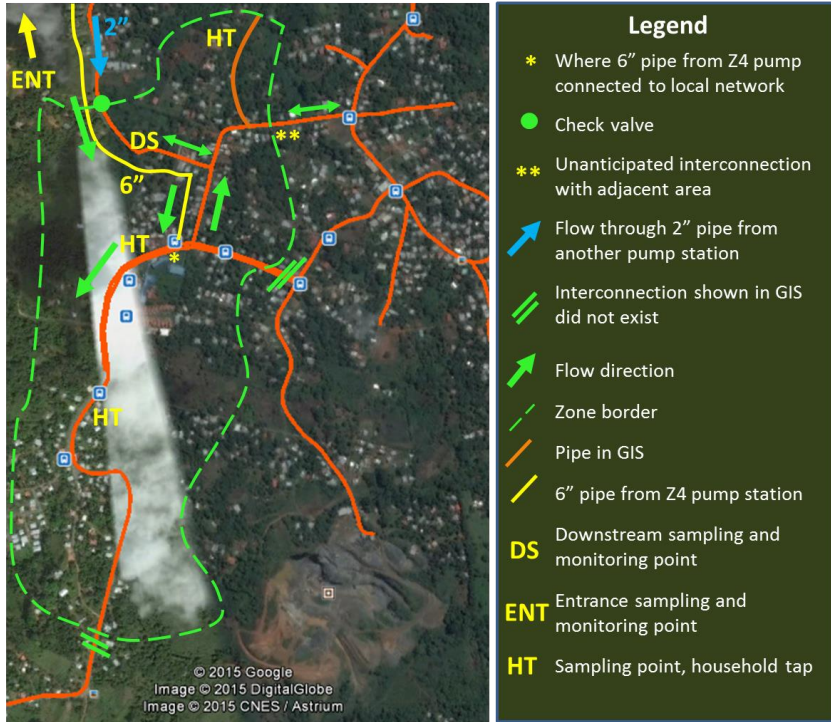

35

36 **Figure S4:** Schematic of Study Zone 4. The sampling and continuous monitoring point (ENT) was  
 37 located at the discharge of the Zone 4 pump station, approximately 2 km north of the upper-left corner  
 38 of this diagram. (Source of satellite images and study zone schematic: Google Earth and IDAAN’s GIS  
 39 database)

Commented [KN1]: Correct?  
 JOHN: Yes, Correct

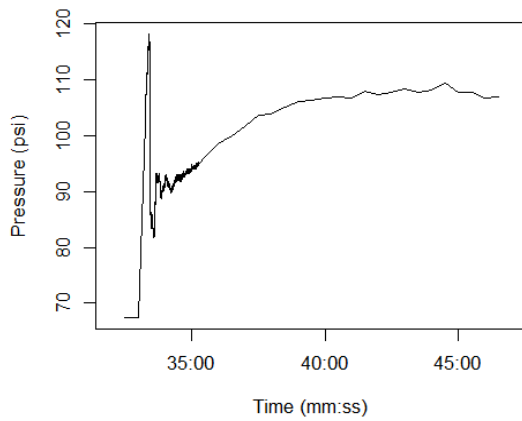

40

41 **Figure S5:** Pressure transient at 3:30 am 11-18-2014 at the discharge of the Zone 4 pump station caused  
 42 by the startup of the second of two pumps.

43 **Table S1:** The ten zones with the highest break rates. \*The second-ranked zone was downstream of  
 44 the Study Zone 4 pump station. †The fifth-ranked zone was Study Zone 3.

| Zone Rank<br>(by break rate) | Pipe<br>length<br>(km) | Number<br>of<br>breaks | Breaks<br>per km<br>per year | Age<br>(years) | Supply       |
|------------------------------|------------------------|------------------------|------------------------------|----------------|--------------|
| 1                            | 0.07                   | 12                     | 55.57                        | 10 to 25       | Continuous   |
| 2*                           | 0.52                   | 51                     | 32.69                        | 10 to 25       | Intermediate |
| 3                            | 1.50                   | 119                    | 26.36                        | <10            | Intermediate |
| 4                            | 0.44                   | 22                     | 16.77                        | >25            | Continuous   |
| 5†                           | 1.35                   | 30                     | 7.41                         | <10            | Intermittent |
| 6                            | 0.88                   | 18                     | 6.85                         | 10 to 25       | Intermittent |
| 7                            | 0.20                   | 4                      | 6.68                         | >25            | Continuous   |
| 8                            | 2.64                   | 49.8                   | 6.28                         | 10 to 25       | Continuous   |
| 9                            | 3.08                   | 54.6                   | 5.91                         | 10 to 25       | Continuous   |
| 10                           | 0.42                   | 7                      | 5.52                         | <10            | Continuous   |

45
